# Supplementary material for: Shelf-Life Evaluation and Lyophilization of PBCA-Based Polymeric Microbubbles
Source: PubMed Central journal article supplement (PMC6781551; doi:10.3390/pharmaceutics11090433), 2019-08-26
Supplement: pharmaceutics-11-00433-s001.pdf [file pharmaceutics-11-00433-s001.pdf]

# Supplementary Materials: Shelf-life evaluation and lyophilization of PBCA-based polymeric microbubbles

Tarun Ojha, Vertika Pathak, Natascha Drude, Marek Weiler, Dirk Rommel, Stephan Rütten, Bertram Geinitz, Mies J. van Steenberg, Gert Storm, Fabian Kiessling and Twan Lammers

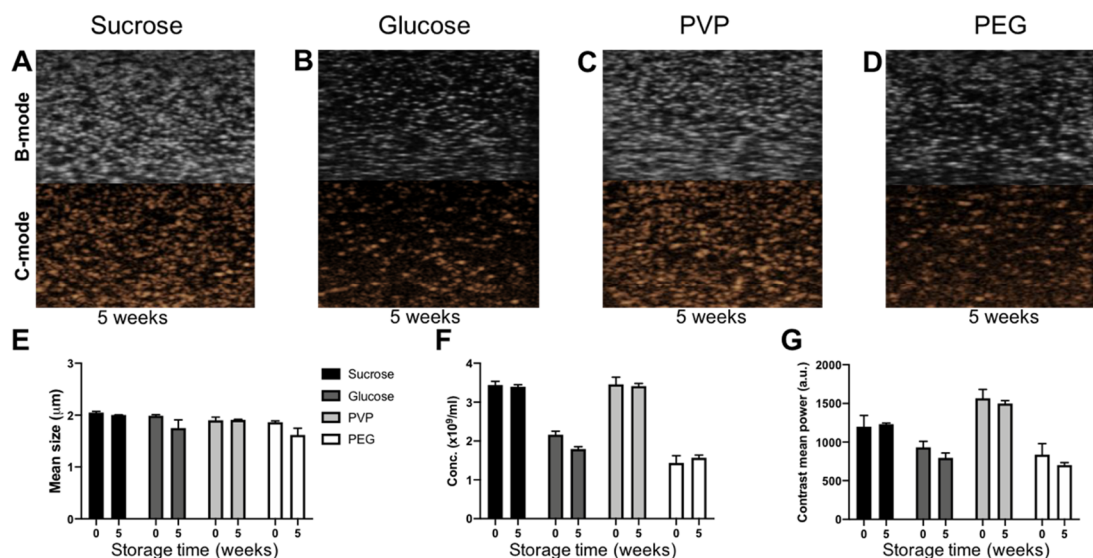

**Figure S1.** Characterization of lyophilized PBCA-MB upon reconstitution and storage. Representative bright mode (B-mode) and contrast mode (C-mode) US images (A–D) of reconstituted PBCA-MB upon initial lyophilization with 5% sucrose, glucose, PVP and PEG and subsequent storage at 25 °C for 5 weeks. The average size and concentration of lyophilized and reconstituted PBCA-MB monitored (E–F). A marginal reduction in size and concentration of reconstituted was observed for MB lyophilized with 5% glucose and PEG after 5 weeks of storage at 25 °C whereas no change was seen for MB lyophilized with 5% sucrose and PVP. Similarly, quantification of the ultrasound images revealed a marginal decrease in backscatter signals of MB lyophilized with 5% glucose and PEG after 5 weeks of storage at 25 °C (G) whereas no change was observed for MB lyophilized with 5% sucrose and PVP. Values represent average  $\pm$  SD of three different batches, measured in triplicates.
